# Supplementary material for: Trihelix Transcriptional Factor GhGT26 of Cotton Enhances Salinity Tolerance in Arabidopsis
Source: MDPI journal article supplement (doi:10.3390/plants11202694), 2022-10-12
Supplement: s1 [file s1]

# TrihelixTranscriptional Factor GhGT26 of Cotton Enhances Salinity Tolerance in *Arabidopsis*

## Supplementary Data

**Table S1.** Primers used in this study

| Primer's name       | Primer's sequence (5'-3')            |
|---------------------|--------------------------------------|
| GhGT26P1            | TGTGGGAGCAGATTTCGCTAAGA              |
| GhGT26P2            | ATAAGACATCTTGGCCGACCCACT             |
| U7F                 | AGAGGTCGAGTCTTCGGACA                 |
| U7R                 | GCTTGATCTTCTTG GGCTTG                |
| ACT2F               | GCACCCTGTTCTTCTTACCG                 |
| ACT2R               | AACCCCTCGTAGATTGGCACA                |
| GT26BamHIEcoRIF     | GCCGGATCCGAATTCATGTACTTATCGGAGAAACC  |
| GT26SalIR           | GCCGTCGACGCTCACTCCTCTATATATAGC       |
| AtABF3F             | CCAAAGAGCGCCCTGGATGCAT               |
| AtABF3R             | CTTGCTTGCGAGCGCGGGAT                 |
| AtABF4F             | AAGGTAGCAGCGGAGGCGGT                 |
| AtABF4R             | TAAGCCGCCAGCAGCAGTGC                 |
| AtDREB1AF           | CCAAGAAACCGGCGGGTTCGT                |
| AtDREB1AR           | GGGCTAAAGCGGCAACGTCG                 |
| AtSTZF              | TCTCGCTCGCGACAACCGTC                 |
| AtSTZR              | GGCTTGCCTTGTGACCACCGA                |
| MBS1                | TATAACGGTTTAACGGTTTAACGGTTTA         |
| MRE1                | CCGGCAGTTAGCCGGCAGTTAGCCGGCAGTTAGGAT |
| MRE3                | TCTAACCTACTAACCTACTAACCTACCA         |
| MRE4                | TATCTCACCTCTCACCTCTCACCGT            |
| GT-3b               | CGGAAAAAGAAAAAGAAAAATC               |
| Site1 - type(GT-3a) | GCGTTACCGTTACCGTTACCAA               |
| GT-1box(Box II )    | TAGGTAAAGGTAAAGGTAAATA               |
| GT2-Box             | GCGGTAATGGTAATGGTAATATA              |
| GT3-Box             | CGGGGTAAAGGTAAAGGTAAATA              |
| Box                 | GCTTAAATTAAATTAAAAAC                 |
